# Supplementary material for: Exploring Mediators of a Guided Web-Based Self-Help Intervention for People With HIV and Depressive Symptoms: Randomized Controlled Trial
Source: PubMed Central journal article supplement (PMC6731054; doi:10.2196/12711), 2019-08-23
Supplement: mental_v6i8e12711_app1.pdf [file mental_v6i8e12711_app1.pdf]

## Multimedia Appendix 1: Items and scoring of the questionnaires

### *Depressive symptoms (PHQ-2)*

Over the last week, how often have you been bothered by any the following problems? Score from 0 (not at all) to 3 (nearly every day).

- 1 Little interest or pleasure in doing things.
- 2 Feeling down, depressed, or hopeless.

### *Activation (BADS)*

Please indicate to what extent the following statements apply to you over the past week. Score from 0 (not at all) to 6 (completely).

- 1 I engaged in a wide and diverse array of activities.
- 2 I am content with the amount and types of things I did.

### *Relaxation*

Please indicate which answer is most appropriate to you over the past week. Score 1 (yes), 2 (sometimes), 3 (no).

- 1 Is it difficult for you to relax?

### *Cognitive coping: catastrophizing and positive refocusing (CERQ-short)*

Please read the sentences below and indicate how often you had the following thoughts over the past week. Score from 1 ((almost) never) to 5 ((almost) always).

- 1 I keep thinking about how terrible it is that I have HIV.
- 2 I continually think how horrible it is to have HIV.
- 3 I think of pleasant things that have nothing to do with having HIV.
- 4 I think of something nice instead of having HIV.

### *Goal reengagement (GDGRS)*

We will ask you to click the answer to the statement that you think best suits you during the past week. Score from 1 (totally disagree) to 5 (totally agree).

- 1 If I have to stop pursuing an important goal in my life because I have HIV I start working on other new goals.

### *Coping self-efficacy*

Click the answer that is most applicable to you over the past week. Score from 1 (totally disagree) to 5 (totally agree).

- 1 I am confident that I can deal with having HIV.
- 2 Whatever happens in relation to having HIV, I'll figure it out.
